# Supplementary material for: Development of EST-SSR markers of Ipomoea nil
Source: PubMed Central journal article supplement — Breed Sci. 2012 Mar 20;62(1):99–104. doi: 10.1270/jsbbs.62.99 (PMC3405949; doi:10.1270/jsbbs.62.99), 2012-03-20
Supplement: 62_99suppl.pdf [file 62_99suppl.pdf]

Supplemental Table 1. EST-SSRs of morning glory automatically extracted and primer-designed by read2Marker

| Unigene ID <sup>1)</sup> | Core motifs <sup>2)</sup>                                            | Repeat<br>(max) <sup>3)</sup> | Repeat<br>(total) <sup>4)</sup> | fw <sup>5)</sup> primer    | Length<br>(mer) | fw<br>Tm | rv <sup>6)</sup> primer  | Length<br>(mer) | rv<br>Tm | Product<br>size(bp) <sup>7)</sup> |
|--------------------------|----------------------------------------------------------------------|-------------------------------|---------------------------------|----------------------------|-----------------|----------|--------------------------|-----------------|----------|-----------------------------------|
| Contig00069              | (tct)11                                                              | 11                            | 11                              | tccccttcttatcgctgcttcttc   | 24              | 64.1     | gtattggacgtagcggaggagtt  | 24              | 65.7     | 180                               |
| Contig00105              | (tc)10                                                               | 10                            | 10                              | accactcttctctctctctccat    | 24              | 64.9     | atgccttctctctctcaataagc  | 24              | 65.0     | 271                               |
| Contig00146              | *s) (ag)6aa(gaa)22gag<br>(gaa)4                                      | 22                            | 32                              | aacaccgcaaattattgtgcctct   | 24              | 64.9     | tccattttgggaagaagatagca  | 24              | 65.0     | 200                               |
| Contig00156              | (ag)10                                                               | 10                            | 10                              | gatttcgtcgaacaagtagcaggg   | 24              | 65.2     | tctcggagatgaaagaggaaatcg | 24              | 65.0     | 231                               |
| Contig00157              | (ag)11                                                               | 11                            | 11                              | cggagagagaagaatcagagaatcc  | 26              | 64.0     | tctcggcttgaacaagaatgtgag | 24              | 64.9     | 241                               |
| Contig00376              | (tc)10                                                               | 10                            | 10                              | gttgaactttcgatgccctctttt   | 24              | 63.9     | gtgggggatagtggtttctctct  | 24              | 64.9     | 189                               |
| Contig00513              | (ag)11                                                               | 11                            | 11                              | acggctcggctactcacaatcaaat  | 24              | 65.1     | ctgtcagcactctgaacttctggc | 24              | 64.9     | 224                               |
| Contig00546              | (ag)11                                                               | 11                            | 11                              | gtcttcatctcgtggcatctt      | 23              | 66.1     | tcagagctcataacgtatggcgaa | 24              | 65.1     | 135                               |
| Contig00659              | * (ag)15                                                             | 15                            | 15                              | ccttcgtgagtgctcaatacagaca  | 25              | 64.9     | tccgcaatccagtgaaacatagt  | 24              | 65.0     | 130                               |
| Contig00709              | (tgt)11agt(tgt)3                                                     | 11                            | 14                              | ctgcagatccattgtgaattgtcc   | 24              | 65.0     | gacattggctgatctatccggaac | 24              | 65.0     | 142                               |
| Contig00762              | (ta)3ga(ta)5catatata<br>(ag)9ga(ag)8at(ag)6atag<br>agagag(ag)3(gtg)3 | 9                             | 37                              | cagatattcgccatctggtctgtg   | 24              | 65.1     | aactttgagatgacgcctttagcg | 24              | 64.9     | 248                               |
| Contig00798              | (tc)4tgaatataaaa(tc)10<br>(ta)8ttctcccaaa(ct)3t(ta)<br>3             | 10                            | 28                              | gcagacgatacgtttctcactcc    | 24              | 65.4     | ggteaacttcaactctcacaccaa | 24              | 64.8     | 299                               |
| Contig00935              | * (ac)12tatt(tc)4                                                    | 12                            | 16                              | cgggtgtgaaagtattgaaaagctcc | 25              | 64.2     | cacatctacacctggtgaaccgc  | 24              | 65.1     | 281                               |
| Contig00955              | (tc)7(ac)6ag(tc)6(ac)3agt<br>ctct(tg)5                               | 7                             | 27                              | cgctatatgcttctgtgattctgagc | 26              | 64.5     | cggttcttgaagctgtaagctg   | 24              | 65.5     | 149                               |
| Contig00990              | (ag)4aaaaagaaaact(ag)6<br>aaaaagaaaact(gga)3aga<br>aggaactat(ag)9    | 9                             | 22                              | aaaaagtcgaccaaccattagcga   | 24              | 65.0     | tggtcatggtgttgttctgtaaa  | 24              | 64.6     | 233                               |
| Contig01070              | (ag)4aa(ag)8ac(ag)9                                                  | 9                             | 21                              | tgctttggacagagaagcgagat    | 24              | 65.7     | tcaattgaagccttctctcagcc  | 24              | 65.1     | 296                               |
| Contig01077              | (ag)11                                                               | 11                            | 11                              | cctgcaatcttgagttgaacaca    | 24              | 65.6     | aagctcagattttcttctgctgg  | 24              | 65.0     | 135                               |
| Contig01115              | (ag)11                                                               | 11                            | 11                              | gcctaagctttctctctttcgcc    | 24              | 64.9     | tatttaacaggagcttcaggggca | 24              | 65.1     | 179                               |
| Contig01174              | * (tc)12                                                             | 12                            | 12                              | tcaaactcccttctctcttctgct   | 24              | 63.9     | tagacgaccgctcttcttgaaac  | 24              | 65.0     | 201                               |
| Contig01190              | (tc)11                                                               | 11                            | 11                              | ctctccatttccaaatccaatcg    | 24              | 64.9     | tttcttctggttcgagagagag   | 24              | 64.8     | 112                               |
| Contig01215              | * (tc)3cccc(tc)14                                                    | 14                            | 17                              | ttgactccactccctctgagagtc   | 24              | 63.4     | aataacagcgcgcagaagaaagag | 24              | 65.1     | 283                               |
| Contig01287              | (ag)10                                                               | 10                            | 10                              | caaaagcatcagcagaagccagta   | 24              | 64.9     | gcaagacaaagaacatgcaaaga  | 24              | 64.9     | 157                               |
| Contig01492              | (gca)3(cta)10                                                        | 10                            | 13                              | cctctctctgatcgttctctcg     | 24              | 65.0     | gcattcaccggctgatttagatc  | 24              | 65.0     | 159                               |
| Contig01546              | (ag)10                                                               | 10                            | 10                              | tccactgtactgttctgagcgc     | 24              | 65.5     | ccgacgagttatctcccactctca | 24              | 65.7     | 296                               |
| Contig01578              | * (ta)12                                                             | 12                            | 12                              | gaagtttgcaaaggagcagcaaat   | 24              | 64.9     | ccaaccacaggggttatcaaaag  | 24              | 64.7     | 290                               |
| Contig01656              | (ag)11                                                               | 11                            | 11                              | cttgtaaagcaggttgggtctgc    | 24              | 65.2     | tatccttggagaagaattgggca  | 24              | 65.0     | 254                               |
| Contig01658              | (ag)10                                                               | 10                            | 10                              | aaggctcacctttgcaagatttc    | 24              | 62.1     | cgcaagtatattccctgcaactcc | 24              | 65.0     | 221                               |
| Contig01699              | * (ag)5aa(ag)12                                                      | 12                            | 17                              | aaagggaaaaagggattgtgtgct   | 24              | 65.1     | gagcaacctcagcatcacaagaa  | 24              | 65.0     | 219                               |
| Contig01735              | (tc)11                                                               | 11                            | 11                              | ttaacctcgaaggagaggaaga     | 24              | 64.8     | tcctcccaagacaaaaatcaaga  | 24              | 65.1     | 237                               |
| Contig01832              | (ag)11                                                               | 11                            | 11                              | ttaatcgatttctcacctcgat     | 24              | 65.0     | cccetaactctcgatccaattcc  | 24              | 65.1     | 151                               |

Supplemental Table 1. (continued)

| Unigene ID <sup>1)</sup> | Core motifs <sup>2)</sup>                     | Repeat (max) | Repeat (total) | fw <sup>3)</sup> primer    | Length (mer) | fw Tm | rv <sup>4)</sup> primer   | Length (mer) | rv Tm | Product size(bp) <sup>7)</sup> |
|--------------------------|-----------------------------------------------|--------------|----------------|----------------------------|--------------|-------|---------------------------|--------------|-------|--------------------------------|
| Contig01954              | * (tc)12                                      | 12           | 12             | tctcaactcgaatgttaccttctca  | 26           | 64.4  | gctttctcttcagctgagcttctc  | 24           | 65.1  | 294                            |
| Contig01964              | (tc)4t(tct)10                                 | 10           | 14             | ctcatcgctctcactcaaacg      | 24           | 64.4  | cagcttaatgcgattgcagagtgt  | 24           | 64.8  | 112                            |
| Contig02004              | (ta)10                                        | 10           | 10             | gatgaatgaaatgatgaggtagag   | 25           | 60.2  | gaggtcacgtgaagagaatgggat  | 24           | 64.9  | 284                            |
| Contig02084              | * (tc)12                                      | 12           | 12             | aatcgggaccctttctctctct     | 24           | 65.3  | cccactctctctccatactcaa    | 24           | 65.0  | 260                            |
| Contig02134              | (ta)11                                        | 11           | 11             | cagccataaacctaaaataacca    | 25           | 62.5  | gacacagcatgcacacactctc    | 23           | 65.5  | 300                            |
| Contig02174              | * (tc)3cacgcaataac(ag)13at(ag)6               | 13           | 22             | agaaccaccaggatattttccgt    | 24           | 64.9  | ccatttcattggcttcttcttgg   | 24           | 65.0  | 225                            |
| Contig02220              | (tc)10tatacaacga(ac)3a(tc)3atctctcatcc(ata)3  | 10           | 19             | tcttctctcaaaccaaaccaaaa    | 24           | 65.1  | ccatgacgacctttctctctgat   | 24           | 65.0  | 272                            |
| Contig02235              | (ta)11                                        | 11           | 11             | ttcatcatctgaagaggagggtc    | 24           | 65.0  | tttcttaatttggtcgtctcgcc   | 24           | 64.6  | 160                            |
| Contig02271              | * (tc)13                                      | 13           | 13             | ccttctgagcttccaaattccaa    | 24           | 66.6  | cacttctctcaacacgaggccat   | 24           | 65.0  | 273                            |
| Contig02293              | * (tg)14                                      | 14           | 14             | tggaaatgaagctgctgtattga    | 24           | 65.0  | tacaaggcagctacagcacaacc   | 24           | 64.5  | 210                            |
| Contig02323              | (cgc)11                                       | 11           | 11             | gtcgcgttttctcaaccaactctt   | 24           | 65.0  | acggagaatcttccaagtgtgtg   | 24           | 65.0  | 247                            |
| Contig02340              | * (ta)14t(ta)4                                | 14           | 18             | aatcaagcatgtaacctgcgacc    | 24           | 65.5  | taattgcctggaagggtgtctgt   | 24           | 65.0  | 209                            |
| Contig02363              | * (gaa)14                                     | 14           | 14             | tcaaaaatcccaaatcacagg      | 22           | 63.1  | gaagaccaccatgagaatcggaat  | 24           | 64.7  | 130                            |
| Contig02441              | * (ta)18                                      | 18           | 18             | ccaacaccaatataccacaaccaga  | 24           | 65.0  | ccgaattaaaatccacacacgaca  | 24           | 65.0  | 284                            |
| Contig02483              | (ta)4ca(ta)7tcaaac(at)3t(ta)5ttat(ta)3        | 7            | 22             | tgacccaatatacagattgaacga   | 24           | 65.7  | tggtcacaactcacaacaactgga  | 24           | 65.0  | 241                            |
| Contig02501              | * (ta)28                                      | 28           | 28             | tggtgtgcctactcccaagtgtta   | 24           | 64.9  | tatagatggctgcagggtggctta  | 24           | 65.9  | 135                            |
| Contig02586              | * (ta)19                                      | 19           | 19             | atgatgtcacgatgagattgagcc   | 24           | 64.7  | ctatcaccaccttagctccatgcc  | 24           | 65.1  | 220                            |
| Contig02797              | * (ta)23gtaagtta(tg)3tta(gt)3                 | 23           | 29             | aatgaagctcctcaacgactctcc   | 24           | 65.0  | gtttaaccagacacccaaaaccga  | 24           | 65.2  | 179                            |
| Contig02819              | (ag)11                                        | 11           | 11             | gagtgaatttgggtgtgggagaa    | 24           | 65.5  | aacggggttgttgaagtgcagagag | 24           | 65.0  | 156                            |
| Contig02903              | * (ag)14aa(gaa)9                              | 14           | 23             | cacgagggaaagagataggagcaa   | 24           | 65.0  | gcttagcagcagcaaaaactccat  | 24           | 65.0  | 154                            |
| Contig03006              | * (tat)18                                     | 18           | 18             | gccattctgtatctgcttgaacct   | 24           | 65.0  | ccctccatacccgatgaactgtag  | 24           | 64.9  | 169                            |
| Contig03049              | * (tc)12tt(tc)3                               | 12           | 15             | ttcagaagcaccagcaaatgatgt   | 24           | 64.4  | gtgactcccaactgaggaggaaag  | 24           | 64.7  | 154                            |
| Contig03077              | * (tc)14                                      | 14           | 14             | tcttctctatgctccctccctct    | 24           | 65.0  | aatgcaggtggaggatgaaatgtt  | 24           | 65.0  | 245                            |
| Contig03096              | * (ta)33                                      | 33           | 33             | acacctctcgggtctcat         | 18           | 60.3  | atgccagaaaagcttggaga      | 20           | 60.0  | 172                            |
| Contig03155              | (tc)9taggaaatctgtt(tc)7(ta)4(tc)4(ta)3ta(ta)5 | 9            | 32             | gaacactgggtctctctccctctc   | 24           | 64.1  | ccatcacattcgattcatctcaa   | 24           | 65.3  | 244                            |
| Contig03167              | (tc)3tttct(tc)11                              | 11           | 14             | tcctttctagtattattaccagtcce | 27           | 60.3  | ctacaagtaaccaaccgggtcagc  | 24           | 65.0  | 166                            |
| Contig03182              | * (ta)32                                      | 32           | 32             | tgctctcatttgatgccttctttg   | 24           | 64.8  | ctataagaaccacaggggtccac   | 24           | 64.2  | 231                            |
| Contig03199              | (tc)11                                        | 11           | 11             | gttgactgtccctctctcattt     | 24           | 64.9  | atgtgacgatagtgatgcctgt    | 24           | 65.1  | 241                            |
| Contig03250              | (ag)11aa(at)3gggtagaa(ag)5                    | 11           | 19             | catctccgtcgtcatatatttgg    | 24           | 64.7  | acacctctctctcacaaccac     | 24           | 64.8  | 133                            |
| Contig03277              | * (ta)3ca(ta)29t(ag)14                        | 29           | 46             | gcctggtcttactctttaaaccgc   | 25           | 64.6  | gagctcaatggttctcaaaaggga  | 24           | 64.9  | 191                            |
| Contig03293              | * (ta)23                                      | 23           | 23             | ggagcccaaatcaactacgaaca    | 24           | 65.2  | gccgctgtattagcttctcaa     | 24           | 65.0  | 211                            |
| Contig03435              | (ag)10                                        | 10           | 10             | aaagcgttggagttgtgcgttat    | 24           | 65.0  | ggccgactcaagcatctaactaa   | 24           | 64.9  | 130                            |

Supplemental Table 1. (continued)

| Unigene ID <sup>1)</sup> | Core motifs <sup>2)</sup>                                                              | Repeat (max) | Repeat (total) | fw <sup>3)</sup> primer     | Length (mer) | fw Tm | rv <sup>4)</sup> primer   | Length (mer) | rv Tm | Product size(bp) <sup>7)</sup> |
|--------------------------|----------------------------------------------------------------------------------------|--------------|----------------|-----------------------------|--------------|-------|---------------------------|--------------|-------|--------------------------------|
| Contig03625              | (ta)5accaatatact(tg)5cgtgtgta(ta)8gaa(ag)8                                             | 8            | 26             | acataccagtcacctaccagtca     | 24           | 65.0  | tgttcatcatgctgtttggagctt  | 24           | 65.2  | 242                            |
| Contig03695              | (tc)11tacctgggatt(tc)4                                                                 | 11           | 15             | gtgtgtgttttggatgctgggtt     | 24           | 66.0  | caagaagaaagggtggacgaagaa  | 24           | 64.9  | 192                            |
| Contig03729              | * (tc)3ttcat(ta)6t(ta)13                                                               | 13           | 22             | ctcatagggtctgctcttctctg     | 24           | 64.9  | tcagccccaccttctcttacctc   | 24           | 65.1  | 222                            |
| Contig03759              | (ct)3t(tc)10                                                                           | 10           | 13             | tgtaaggcttcgatgagtcacac     | 24           | 64.8  | ctctctctaaacctccctctgc    | 24           | 65.0  | 216                            |
| Contig03766              | (ag)3aaagaaatatt<br>(ag)10aaa(ag)3                                                     | 10           | 16             | aagaaggtatagctcgtcgtc       | 24           | 64.8  | tgacttatgtttcaggtgcctaaa  | 24           | 65.0  | 270                            |
| Contig03778              | * (taa)15                                                                              | 15           | 15             | gggattgatctgaagaaacctcat    | 24           | 65.5  | gtcatcgaactcaaataacctcaa  | 25           | 62.6  | 290                            |
| Contig03812              | (cct)4gaataccatacaa(tg)3<br>ctggt(gat)5ga(gga)3catg<br>gatt(atg)3catggattatg<br>(gat)3 | 5            | 21             | gacaaggcagaaacagaggattgtc   | 25           | 64.6  | tctctctggccttggaaatagttgg | 24           | 64.9  | 264                            |
| Contig03821              | (tc)3actatattctccc(tc)11                                                               | 11           | 14             | tcgctctcttctactacaaacccc    | 24           | 64.9  | cattcatcgacgattggcagatac  | 24           | 64.8  | 265                            |
| Contig03839              | (gaa)11                                                                                | 11           | 11             | atcattccaatcataatcgccag     | 24           | 65.1  | aaaaaccgatgacacatcaatccc  | 24           | 65.1  | 275                            |
| Contig03918              | (tc)11                                                                                 | 11           | 11             | caaagcacagcaagactactccaa    | 24           | 64.9  | atccatttggaaataacggggaag  | 24           | 65.0  | 125                            |
| Contig03945              | (tc)10                                                                                 | 10           | 10             | tgctcccattctaaagctctctg     | 24           | 65.1  | atccaaattcctcacaatcatgcg  | 24           | 65.1  | 300                            |
| Contig04019              | * (tat)15                                                                              | 15           | 15             | cttgttgattgccaacaaaggcta    | 24           | 64.5  | ttaaggctacagcgtgcaaaatga  | 24           | 65.0  | 222                            |
| Contig04023              | * (ag)12                                                                               | 12           | 12             | gtctttgtgtctggattcatcccc    | 24           | 65.1  | gctctctcaatgtctccaagctaa  | 24           | 65.0  | 229                            |
| Contig04077              | (tc)10                                                                                 | 10           | 10             | ttatctctctcctgtgaaacccc     | 24           | 65.1  | ttaacatgccccaacacgtaag    | 24           | 65.0  | 137                            |
| Contig04087              | * (tc)12                                                                               | 12           | 12             | tctctctatctctggagctctcgtc   | 25           | 63.7  | gagaagcaaatccaagaaaacgga  | 24           | 64.8  | 214                            |
| Contig04114              | (ag)4aaac(ag)11gaagtgt<br>aagtg(ag)3ggggagaggg<br>(ag)10                               | 11           | 28             | cattggagaaggagaagcacttga    | 24           | 64.1  | cgtagaagacgagagacggagagg  | 24           | 65.0  | 147                            |
| Contig04122              | (tc)11tatcgc(tc)5                                                                      | 11           | 16             | tctgtccatctgccaatagagcaa    | 24           | 65.3  | caacagctttctcgggtctccta   | 24           | 65.0  | 165                            |
| Contig04153              | (tc)11                                                                                 | 11           | 11             | ctaccagaccctctgcttctac      | 24           | 64.5  | cgaaaatgggtattgcagttgaca  | 24           | 65.1  | 297                            |
| Contig04156              | * (ag)12                                                                               | 12           | 12             | ccccatcccccaataacacttct     | 24           | 65.1  | caaccagaacaacaccaaaacgc   | 24           | 64.9  | 210                            |
| Contig04203              | * (ta)5t(ag)10                                                                         | 10           | 15             | cctctccccttagctttcttccca    | 24           | 65.1  | ttgtctcctcccctttttggtgat  | 24           | 64.9  | 127                            |
| Contig04237              | * (tc)13t(tc)6                                                                         | 13           | 19             | cttaactctgtttccagccctcc     | 24           | 64.5  | tgctaccagaaaacaatggggact  | 24           | 65.0  | 235                            |
| Contig04246              | (ag)10aaagagaa(ag)3                                                                    | 10           | 13             | ccaagtctctggatcacaacactttat | 27           | 62.9  | ttttccaccataacaaccctcc    | 24           | 65.1  | 287                            |
| Contig04324              | (tc)3caccattatt(tc)3cc<br>(tc)10ttcctg(tc)4                                            | 10           | 20             | acctctctctcgtatccgtctttct   | 24           | 64.9  | aaactcaacagctcaacgccttc   | 24           | 65.1  | 156                            |
| Contig04332              | (ta)4ttctccct(tc)10tt<br>(tc)7tcca(ta)4                                                | 10           | 25             | tcctgcacatacagcttctgcaat    | 24           | 65.3  | gctttgtctctccaccttcatgtct | 24           | 65.0  | 161                            |
| Contig04347              | (tc)4ta(tc)10                                                                          | 10           | 14             | tgccactcttacagccttctctcc    | 24           | 65.3  | catctgacaccaaccttgcaaaag  | 24           | 65.0  | 284                            |
| Contig04554              | (tc)10                                                                                 | 10           | 10             | gcgttgtgacctcactgtctgat     | 24           | 64.9  | tgcttaagaatcaccggtcgaat   | 24           | 65.0  | 115                            |
| Contig04592              | * (tc)12tgtg(ac)3                                                                      | 12           | 15             | tgtatattaatcagccccacc       | 24           | 63.0  | acttgggacttgggagtggtgata  | 24           | 65.1  | 120                            |
| Contig04638              | (tc)10                                                                                 | 10           | 10             | gacaacctcaactcccaagctct     | 24           | 64.0  | agttcaactgttgggtccatttca  | 24           | 65.0  | 264                            |

Supplemental Table 1. (continued)

| Unigene ID <sup>1)</sup> | Core motifs <sup>2)</sup>                                     | Repeat (max) | Repeat (total) | fw <sup>3)</sup> primer  | Length (mer) | fw Tm | rv <sup>4)</sup> primer  | Length (mer) | rv Tm | Product size(bp) <sup>7)</sup> |
|--------------------------|---------------------------------------------------------------|--------------|----------------|--------------------------|--------------|-------|--------------------------|--------------|-------|--------------------------------|
| Contig04657              | * (ag)17                                                      | 17           | 17             | aatgtgctaaactctctctcgcca | 24           | 65.3  | agagcggcaaataccacagaactc | 24           | 65.0  | 203                            |
| Contig04735              | * (ct)3tcta(tc)12                                             | 12           | 15             | agtgcgagctctcaactcacaaga | 24           | 65.0  | cagtaaggcgcgagactccattt  | 24           | 64.9  | 106                            |
| Contig04740              | (tc)10                                                        | 10           | 10             | agcacagtctctctctctccagg  | 24           | 64.8  | ctcattctgctatgggtgctctt  | 24           | 65.0  | 183                            |
| Contig04759              | (tc)10t(tc)4                                                  | 10           | 14             | aagacatctgctcagtgctctt   | 24           | 64.9  | tgcaagagattgcgacgaaactac | 24           | 64.8  | 192                            |
| Contig05021              | * (tc)14                                                      | 14           | 14             | tctcatcaaccaattcaacacct  | 24           | 64.0  | gtatggatcatccctcgacagctt | 24           | 64.8  | 127                            |
| Contig05069              | * (tc)12                                                      | 12           | 12             | gtggttttgcaagcgacatttg   | 23           | 65.8  | tgagcttttaccacagacctcag  | 24           | 64.9  | 242                            |
| Contig05098              | * (ag)17                                                      | 17           | 17             | tcggttcggtttggtatttacgc  | 24           | 65.2  | acagattgaggtttgttgatcgc  | 24           | 65.8  | 173                            |
| Contig05104              | * (ag)14                                                      | 14           | 14             | gggcagaaaagaaaagaagaagc  | 25           | 63.8  | gccacaatgctaggggaatacagc | 24           | 65.0  | 249                            |
| Contig05140              | * (ag)17(ga)3                                                 | 17           | 20             | tgcttgactagggagactctgaa  | 24           | 65.7  | ccgctccataacaagctcgtatc  | 24           | 65.1  | 292                            |
| Contig05179              | (tc)10                                                        | 10           | 10             | tatttttccaaacccaaacgcct  | 24           | 67.2  | tgacgtaacctgacagagtgcgc  | 24           | 65.0  | 291                            |
| Contig05275              | * (tc)12                                                      | 12           | 12             | gccacaatctcgaagaagaagaa  | 24           | 65.0  | gccatatccaaaggttccttagc  | 24           | 65.0  | 250                            |
| Contig05282              | * (tc)13                                                      | 13           | 13             | acggcctgacagccagataaataa | 24           | 65.0  | aacaacgcagagtcggagagagat | 24           | 64.9  | 129                            |
| Contig05319              | (cg)5cacacaca(ta)10                                           | 10           | 15             | agagctaccactgccaaattacg  | 24           | 64.7  | aaatcttggatctccctccctg   | 24           | 64.7  | 138                            |
| Contig05326              | * (ag)4gg(ag)13cg(tg)5                                        | 13           | 22             | acgaaggagctcaacgctgtagac | 24           | 65.3  | atcaacgatagaaaactcggcgaa | 24           | 65.1  | 225                            |
| Contig05370              | (ag)5gg(ag)10gcgcccca(tg)3                                    | 10           | 18             | gggtcaagccaccagttgtaaag  | 24           | 65.0  | ctctatggcgcacacctctagaaa | 24           | 64.9  | 283                            |
| Contig05406              | (ag)11                                                        | 11           | 11             | atagaaagcactcagacttgcc   | 24           | 65.0  | actcgttagagacatccttcccc  | 24           | 65.0  | 112                            |
| Contig05407              | * (ag)14                                                      | 14           | 14             | tcctcaccagacagagctgta    | 24           | 65.3  | cacctccctcactctctccactc  | 24           | 64.9  | 128                            |
| Contig05421              | * (ag)4aa(ag)12                                               | 12           | 16             | cgctatacatcacgctgctctg   | 24           | 65.1  | ttgtttctcgtctactctcaggg  | 24           | 65.0  | 167                            |
| Contig05432              | * (tc)14tgcacgcacaga(ta)3                                     | 14           | 17             | gacggtacgccaattttctatgct | 24           | 63.0  | gateaccatgcaccttctgaattg | 24           | 65.0  | 238                            |
| Contig05448              | * (tc)13                                                      | 13           | 13             | ctcaaatcacaatctcttcccc   | 24           | 65.2  | ttgaattgcccgtaccagatgaga | 24           | 64.9  | 279                            |
| Contig05461              | * (ag)17                                                      | 17           | 17             | cgcttctaattctgggctgttcta | 24           | 64.9  | cgttgtcccaagcacaagata    | 24           | 65.4  | 281                            |
| Contig05536              | * (ta)7gtaactgt(ag)12                                         | 12           | 19             | ttgaatttccagtttgaccact   | 24           | 64.9  | accgaactcccactcatgttatt  | 24           | 65.0  | 270                            |
| Contig05575              | * (ag)17                                                      | 17           | 17             | caagagagagcgaatcttttaggg | 27           | 64.9  | aggctatcgttctttctctctcg  | 24           | 65.0  | 180                            |
| Contig05580              | * (ag)14                                                      | 14           | 14             | ccatcctcttagaaacagcctca  | 24           | 64.9  | tgatgttcacgcttcttctgta   | 24           | 64.9  | 249                            |
| Contig05600              | (ct)3ttctctttctg(tc)6(ta)4a(ta)5atatata(at)3atataatataca(tc)3 | 6            | 24             | tttctctcaatcacccttaca    | 24           | 65.0  | caaatttcccacttctccaactg  | 24           | 65.0  | 179                            |
| Contig05644              | * (tc)13                                                      | 13           | 13             | cgctgctttttctctctgttc    | 24           | 64.9  | caaagagtcgacgaaccttagcgt | 24           | 65.0  | 268                            |
| Contig05652              | * (ag)3tg(ag)13                                               | 13           | 16             | gagcgtctctgatcaacccta    | 21           | 63.8  | aagcatcggtacctgtgagagacc | 24           | 65.0  | 235                            |
| Contig05704              | (ag)10gg(ag)4                                                 | 10           | 14             | ctcgcagcagataacgaatcaag  | 24           | 66.2  | tgcactcacatttcatcgatctca | 24           | 65.1  | 178                            |
| Contig05733              | * (ag)14                                                      | 14           | 14             | ggacagtctgctctccatttgta  | 24           | 63.9  | agagaccattgaacatctctcgc  | 24           | 65.1  | 262                            |
| Contig05806              | * (tc)12                                                      | 12           | 12             | tctccttacactcagccaaat    | 24           | 65.1  | tggttttatctcaaggagagca   | 24           | 65.2  | 224                            |
| Contig05829              | * (tc)16                                                      | 16           | 16             | ctcatagcttcttctgggttcg   | 24           | 64.5  | atcagagacgacgcaaaaaccttc | 24           | 65.0  | 271                            |
| Contig05869              | (ag)11                                                        | 11           | 11             | atgcatctgctaccggaaaaagc  | 24           | 64.5  | gagactcgtcaatccccttctca  | 24           | 65.1  | 149                            |
| Contig05911              | * (ta)4tgtatg(ta)3ttgcggagggggg(ag)17                         | 17           | 24             | cgtcctcgtaaacggaaagtaacg | 24           | 65.0  | tacctttacggagcaaaagcctca | 24           | 65.4  | 242                            |
| Contig06021              | (tc)10                                                        | 10           | 10             | ccaccaatcaggagaaagatttg  | 24           | 65.0  | ggatgaaggtccagcattttcact | 24           | 64.8  | 124                            |

Supplemental Table 1. (continued)

| Unigene ID <sup>1)</sup> | Core motifs <sup>2)</sup>                                                   | Repeat (max) | Repeat (total) | fw <sup>3)</sup> primer    | Length (mer) | fw Tm | rv <sup>4)</sup> primer  | Length (mer) | rv Tm | Product size(bp) <sup>7)</sup> |
|--------------------------|-----------------------------------------------------------------------------|--------------|----------------|----------------------------|--------------|-------|--------------------------|--------------|-------|--------------------------------|
| Contig06063              | * (tc)13tttcgggtc(ta)3                                                      | 13           | 16             | ttacaaaagggagtagcggagcga   | 24           | 65.1  | tggagaaggtagtaggcaacggag | 24           | 64.9  | 300                            |
| Contig06086              | (ag)11                                                                      | 11           | 11             | atccccggaggtagtgaggagt     | 24           | 65.1  | aagctgcaggtgcagtagtgtagc | 24           | 65.2  | 264                            |
| Contig06087              | * (tc)13                                                                    | 13           | 13             | tgatgattcttgaaggggagcact   | 24           | 65.4  | agccttagctctctctcccttg   | 24           | 64.6  | 193                            |
| Contig06105              | (ag)10atg(ag)3                                                              | 10           | 13             | atctctctcgatccgtctgcaaat   | 24           | 64.7  | aatgccatgctcaaggcaatagag | 24           | 65.6  | 149                            |
| Contig06115              | (ag)11t(ag)4                                                                | 11           | 15             | gactgatgggacttcagaaatga    | 23           | 60.5  | atgagatggctctgctcttcacct | 24           | 64.9  | 128                            |
| Contig06196              | * (ag)16                                                                    | 16           | 16             | ggctggaatgacaggaatcaatc    | 24           | 65.1  | cattctctgccacagtcctctct  | 24           | 65.4  | 276                            |
| Contig06352              | (tc)10                                                                      | 10           | 10             | cctcatctctctctttaaataccc   | 27           | 61.9  | aacagatcaaaggaggettcatc  | 24           | 65.0  | 225                            |
| Contig06422              | * (ag)3aa(ag)14                                                             | 14           | 17             | tccgccacttcagagcatacataa   | 24           | 65.0  | tagcaatgagcttttgcttctccc | 24           | 65.0  | 192                            |
| Contig06449              | * (ta)13                                                                    | 13           | 13             | ctttgctttgttttgggttacga    | 24           | 65.2  | gagacgcaaccagaaaaggaacat | 24           | 64.9  | 213                            |
| Contig06459              | * (ag)4at(ag)12                                                             | 12           | 16             | ccagtgtcttccctgcaaatgta    | 24           | 64.7  | ttctcttctagctccccaaaacc  | 24           | 65.0  | 297                            |
| Contig06487              | (ag)3aaagagaa(ag)10                                                         | 10           | 13             | cctcattcccataaacctcattt    | 24           | 64.4  | ctcaacacatacaaaacccccatt | 24           | 65.1  | 281                            |
| Contig06503              | (tc)10                                                                      | 10           | 10             | tctgcctgggtgcttactttctt    | 24           | 64.5  | acaatatggtttcaggccatggag | 24           | 65.2  | 297                            |
| Contig06566              | * (ag)17                                                                    | 17           | 17             | tcatagctattacaggaaacactgga | 27           | 63.2  | tgctgtatgatcaggaagcacc   | 24           | 64.9  | 157                            |
| Contig06574              | (tc)10ttctagtcacc(tc)3                                                      | 10           | 13             | gcagagtgatgagtcgcacattt    | 24           | 64.9  | agctttgcttgccttttccaag   | 24           | 65.0  | 212                            |
| Contig06590              | * (tc)16                                                                    | 16           | 16             | cttggggttacccttttctccac    | 24           | 65.0  | gccgetaattcacggaatgtaaaa | 24           | 65.1  | 288                            |
| Contig06640              | * (tg)4gaaatattttgc(ag)17                                                   | 17           | 21             | gctgcttccgcaaagttcatatc    | 24           | 65.2  | tcaacaatcacgaagcaaccactt | 24           | 65.1  | 117                            |
| Contig06657              | * (tc)4cc(tc)12                                                             | 12           | 16             | cccgcctctctattatccat       | 24           | 65.2  | cttattgattccgttccgagtgc  | 24           | 65.0  | 168                            |
| Contig06713              | * (ag)3ataggggg(ag)12                                                       | 12           | 15             | ctgccattgaaaagctcagtagcc   | 24           | 65.4  | ttgatttgcacctcttcaacta   | 24           | 65.1  | 255                            |
| Contig06791              | (ta)10                                                                      | 10           | 10             | tcatattgcagagactggcaaagc   | 24           | 64.8  | acctattgggttcaatgggtgtg  | 24           | 65.0  | 191                            |
| Contig06793              | (ag)3aaagg(ag)10                                                            | 10           | 13             | cccactcttccctctctattctcc   | 24           | 64.5  | acaccaatccacagctcttccctc | 24           | 64.8  | 120                            |
| Contig06795              | * (ag)6a(ag)12g(ga)3                                                        | 12           | 21             | tccataccaattaccaagacagc    | 25           | 64.3  | gtccgaacagtaggagtcagccat | 24           | 65.0  | 280                            |
| Contig06796              | * (ag)13                                                                    | 13           | 13             | ggggtttgccttagctcactgaa    | 23           | 63.9  | gaaagccgcctttatagacagcaa | 24           | 64.8  | 256                            |
| Contig06910              | (ta)3cctgtttgcg(ta)11nac<br>ctacntanaa(ta)4                                 | 11           | 18             | caccattttctatccgactggagc   | 24           | 65.1  | ttacgagatttgaatgcccagaag | 24           | 64.7  | 163                            |
| Contig06934              | * (ac)3ctctcttga(tc)16                                                      | 16           | 19             | gaaaccctcaatttcaaagga      | 22           | 62.4  | accaaattgacccaagtggagat  | 24           | 65.0  | 216                            |
| Contig06948              | * (ag)3tctcagacc(tc)14                                                      | 14           | 17             | ccagcctctctacgcataaccatt   | 24           | 64.7  | tgaccattaaaagatggggaggaa | 24           | 64.8  | 237                            |
| Contig07002              | * (tc)13                                                                    | 13           | 13             | gactctctcgtaaacacagcttagta | 27           | 60.9  | cgttagacaaagaccggtcaaaga | 24           | 64.7  | 158                            |
| Contig07004              | * (tg)6(ag)12                                                               | 12           | 18             | gacacttttctctgcacaaagc     | 24           | 64.3  | cggagatgatcagcaaggaagaat | 24           | 64.9  | 196                            |
| Contig07073              | (ag)10                                                                      | 10           | 10             | ttgggtagtggggcttaggaagt    | 24           | 65.1  | acattcttgatccccaaatgcagc | 24           | 65.5  | 259                            |
| Contig07082              | (tc)11                                                                      | 11           | 11             | gagatgggtgtgatggagagcaga   | 24           | 65.0  | agcggcgtagaagtaaatgcagac | 24           | 64.9  | 232                            |
| Contig07087              | * (ag)8aa(ag)12                                                             | 12           | 20             | atgagtatggetcccaaatccaac   | 24           | 64.4  | cctggctccaaaaacagtaacgg  | 24           | 65.0  | 218                            |
| Contig07091              | (tc)11                                                                      | 11           | 11             | gcggaaacttccacagtccactaa   | 24           | 65.7  | ataccgtcaagcatctccgatctc | 24           | 64.9  | 285                            |
| Contig07135              | (tc)10                                                                      | 10           | 10             | agttccgtccccattttcttgt     | 24           | 65.0  | tatgtattgatcagctgtgccgtg | 24           | 64.3  | 161                            |
| Contig07202              | * (ag)17                                                                    | 17           | 17             | ggcctctctctctctctaaccta    | 24           | 64.2  | tcccttagctctgctgccataag  | 24           | 64.9  | 150                            |
| Contig07219              | * (tct)16                                                                   | 16           | 16             | ttgtggtgatggcatcttgattct   | 24           | 65.0  | tcagatcttcttgaatctccgc   | 24           | 65.1  | 186                            |
| Contig07258              | (tc)9ta(tc)4gcacatttatt<br>(tc)4gcac(ta)3gcacatttat<br>(ag)3gcaca(ta)3(tg)5 | 9            | 31             | tgctctgtgtaaatactttctctc   | 26           | 62.9  | gaaattactgctctgcccttccct | 24           | 65.0  | 221                            |

Supplemental Table 1. (continued)

| Unigene ID <sup>1)</sup> | Core motifs <sup>2)</sup>                     | Repeat (max) | Repeat (total) | fw <sup>3)</sup> primer    | Length (mer) | fw Tm | rv <sup>4)</sup> primer    | Length (mer) | rv Tm | Product size(bp) <sup>7)</sup> |
|--------------------------|-----------------------------------------------|--------------|----------------|----------------------------|--------------|-------|----------------------------|--------------|-------|--------------------------------|
| Contig07260              | (tgt)11agt(tgt)3                              | 11           | 14             | ctgcagatccattgtgaattgtcc   | 24           | 65.0  | gacattggctgatctatccggaac   | 24           | 65.0  | 142                            |
| Contig07295              | (tc)3t(tct)11                                 | 11           | 14             | gttcagtcgccactcttccctctt   | 24           | 65.2  | tgttgtcccatttcccagtttat    | 24           | 64.8  | 297                            |
| Contig07342              | (ag)4ggaggaggagg(ag)10                        | 10           | 14             | tccaccaataataaattggggagtga | 25           | 64.4  | cagagtcgttgcgatgaagtctgt   | 24           | 65.0  | 285                            |
| Contig07368              | * (tc)3tttctccat(tc)17                        | 17           | 20             | aaagcccacaaagctctcatgtgt   | 24           | 65.4  | gctgtaaccaattgggagcaaaag   | 24           | 65.0  | 255                            |
| Contig07440              | * (tc)14                                      | 14           | 14             | cgctctacttcgtcgttgcagaa    | 24           | 65.1  | tggaagagaagacgacaatggaga   | 24           | 64.5  | 218                            |
| Contig07481              | (ag)11                                        | 11           | 11             | ggcggtttagtgtttgaatagcc    | 24           | 64.0  | gggcttcaatttctcttctctctc   | 24           | 64.7  | 260                            |
| Contig07492              | (tc)10ttctctccc(tc)3(ta)4                     | 10           | 17             | gacttccctgtgaacatcctcgtt   | 24           | 64.9  | agcagccacatttcatttcatctc   | 24           | 65.2  | 153                            |
| Contig07514              | (ga)3a(ag)11                                  | 11           | 14             | ggcctctctgtaccttctccaaca   | 24           | 65.1  | tccgtgaaacatgaaaagtctca    | 24           | 65.0  | 161                            |
| Contig07568              | * (ga)3aaa(ag)16                              | 16           | 19             | gactaccctgtgtattgagagtggg  | 25           | 62.3  | tctcttcaagctctccaccatct    | 24           | 64.9  | 269                            |
| Contig07632              | (tc)10                                        | 10           | 10             | tccttcatcttctccacctcttca   | 24           | 63.6  | ctcgcgactctatctcattcccag   | 24           | 65.6  | 219                            |
| Contig07652              | (tc)11                                        | 11           | 11             | ttctccggcttatcattttctca    | 24           | 65.1  | tgaagactggaaacctacgggaaa   | 24           | 65.1  | 164                            |
| Contig07663              | * (ag)12                                      | 12           | 12             | gggagtgaggaggaggagaaagata  | 24           | 65.1  | tgagggacagaatctctctcaaac   | 24           | 65.0  | 217                            |
| Contig07664              | * (ag)16                                      | 16           | 16             | cctaaagtccaagaattgtggagga  | 25           | 61.9  | ggaagagagagaatggtaccacg    | 24           | 64.4  | 101                            |
| Contig07718              | * (ac)3ccctctt(tc)16                          | 16           | 19             | tcttccaacccacatccttaact    | 24           | 64.1  | ccgatctccttccacactgaagat   | 24           | 65.0  | 275                            |
| Contig07725              | * (ac)5at(ag)15                               | 15           | 20             | cttctggctctcacaactgtgagtcg | 24           | 64.4  | ttctgattctccattttctcccc    | 24           | 65.6  | 194                            |
| Contig07741              | (ta)3atcctgaca(ta)3at<br>(tc)3gttgc(tc)11     | 11           | 20             | tctctgtctcgcacacacactgtc   | 24           | 65.2  | agacctctccattctctctccact   | 24           | 64.9  | 203                            |
| Contig07752              | * (tct)17                                     | 17           | 17             | atgtgattctttgcaccgtttcct   | 24           | 65.1  | tccacactgccttcaactaccata   | 24           | 64.9  | 150                            |
| Contig07772              | * (ag)12                                      | 12           | 12             | gtggcctgtggtggttgaagaaa    | 23           | 65.5  | cttaccacagttcgaaacctttt    | 24           | 64.7  | 272                            |
| Contig07773              | (tc)10                                        | 10           | 10             | ctttcaggcttcttcttccccaa    | 24           | 65.0  | atgagttcttcttctgttttctgc   | 24           | 64.9  | 158                            |
| Contig07907              | (tc)8cccc(tc)5(ac)3a(ta)5                     | 8            | 21             | gctcccccttctctgttctttt     | 24           | 64.7  | aaacccactcagatgactccaaa    | 24           | 65.2  | 283                            |
| Contig07974              | * (ta)27                                      | 27           | 27             | gtcaaccacaaaagaaagtctgcc   | 24           | 65.1  | ggcttcttcaattcacgcatcata   | 24           | 64.5  | 293                            |
| Contig08117              | (ac)5aat(ta)11(tc)4(ta)5t<br>atat(ag)3ta(ag)9 | 11           | 37             | tggggtatgggtttttagctg      | 24           | 65.1  | ccatgtaaccccaaaactgcaaat   | 24           | 65.0  | 205                            |
| Contig08954              | (taa)10                                       | 10           | 10             | tgggttaatttctctctctcccc    | 25           | 65.4  | gacgctgcaggatagtgtttctga   | 24           | 65.0  | 165                            |
| Contig09450              | (tc)6cctctctt(tc)7(ta)8ca<br>(ta)4            | 8            | 25             | cacaacactcaaaacagtcacct    | 24           | 63.7  | gctacatctccttgcattgtgg     | 24           | 65.1  | 261                            |
| Contig09582              | * (tc)17ngaact(tc)4                           | 17           | 21             | ttggaatccagtttgcgtgtgat    | 24           | 65.0  | gtgtaccgctgtccccgtttt      | 21           | 65.4  | 263                            |
| Contig09733              | (ta)10                                        | 10           | 10             | gctgcaacttttccagaagcaatg   | 24           | 64.4  | catctcaactcaacattgccaaac   | 24           | 65.0  | 236                            |
| Contig10273              | * (tc)12                                      | 12           | 12             | ttgttcacctgataaagcagcca    | 24           | 65.0  | ctgcttctctggttaaattggattgc | 24           | 65.0  | 189                            |
| Contig10281              | (ta)3aa(ac)10                                 | 10           | 13             | ttcattcaagctaaagagcagca    | 24           | 64.5  | aacaaacctgcaagtacgcagaa    | 24           | 64.9  | 143                            |
| Contig10368              | * (ag)13                                      | 13           | 13             | gcaagcttcgcatgtacacatac    | 24           | 65.0  | aaacaaaaacccgctcttctcactt  | 24           | 65.2  | 147                            |
| Contig10405              | * (ta)17                                      | 17           | 17             | ctgcacagcaaggatttaacaatga  | 25           | 64.5  | tggagaagaacatggtttgaagg    | 24           | 63.6  | 263                            |
| Contig10408              | (tca)11                                       | 11           | 11             | tgaggaatccaacccgtttctcta   | 24           | 65.1  | tacgcgggagcattcatctaaagt   | 24           | 65.1  | 256                            |
| Contig10425              | * (ag)18                                      | 18           | 18             | cgtccttgaccttcagttcctgt    | 24           | 65.0  | gtatccaaccacactgccgacta    | 24           | 67.3  | 268                            |
| Contig10511              | * (ag)17                                      | 17           | 17             | tataggatgatgcaaggcagagca   | 24           | 65.1  | tgccgaggaatgaaaagaggaata   | 24           | 65.1  | 151                            |
| Contig10526              | (taa)3(caa)8(taa)7ta<br>(taa)4                | 8            | 22             | ggtttttgtcaagagcatttccc    | 24           | 64.1  | tttgattgtatccctcgtctcct    | 24           | 64.9  | 168                            |

Supplemental Table 1. (continued)

| Unigene ID <sup>1)</sup> | Core motifs <sup>2)</sup> | Repeat (max) | Repeat (total) | fw <sup>3)</sup> primer     | Length (mer) | fw Tm | rv <sup>4)</sup> primer   | Length (mer) | rv Tm | Product size(bp) <sup>7)</sup> |
|--------------------------|---------------------------|--------------|----------------|-----------------------------|--------------|-------|---------------------------|--------------|-------|--------------------------------|
| Contig10818              | * (tc)13                  | 13           | 13             | gcacctcagattaacaacactttcagg | 27           | 65.2  | tccatatctttgccttagctccca  | 24           | 65.1  | 141                            |
| Contig10873              | (tc)11                    | 11           | 11             | ctccccctagtgctatttctct      | 24           | 65.0  | gaagagatgccattgttgagtga   | 24           | 64.9  | 119                            |
| Contig10901              | (ta)10                    | 10           | 10             | gtatgcacgatttccacgaaatga    | 24           | 65.1  | gaatacgtgtctgaatccgggaag  | 24           | 65.0  | 287                            |
| Contig10939              | (ac)11                    | 11           | 11             | gcattggacaggaaaagtcgaaat    | 24           | 64.6  | aggaattaggccttgctcatctt   | 24           | 65.4  | 216                            |
| Contig10987              | (cgg)11                   | 11           | 11             | ggtagcgattggcattacatcctc    | 24           | 64.9  | tatccagcttcttcgatccactcc  | 24           | 64.9  | 214                            |
| Contig11104              | (taa)11                   | 11           | 11             | cagcattgaagtctcaacacaa      | 24           | 63.6  | attgcggtgaagtatageccagaa  | 24           | 65.0  | 295                            |
| Contig11406              | (ag)11                    | 11           | 11             | gagacagagaaatgctttgggcat    | 24           | 65.0  | gtcttccacctccaaacctct     | 23           | 66.0  | 233                            |
| Contig11626              | * (ag)15g(gt)3            | 15           | 18             | gttttgaggctcgacattggaatc    | 24           | 64.9  | tgcaaccacatgctcactatcctt  | 24           | 65.1  | 162                            |
| Contig11928              | (tc)11tttaattt(tc)4       | 11           | 15             | tcttctctcaaggtggttgttg      | 24           | 64.8  | gagcaagaaataaagctccac     | 22           | 60.4  | 214                            |
| Contig11987              | * (gaa)14gatgatatcc(ag)3  | 14           | 17             | tgaagaaactcccccaaccttc      | 24           | 64.7  | ttggggcctccaaatgtgatatag  | 24           | 65.1  | 293                            |
| Contig12093              | * (ta)15                  | 15           | 15             | gctgctctacttctggagctcatc    | 24           | 65.0  | aatcttgaattgctttgagctcg   | 24           | 64.9  | 292                            |
| Contig12195              | * (ag)3taataa(gaa)19      | 19           | 22             | ctgattgttcaaaaccacactcg     | 24           | 64.9  | gcagctctgtatttgcatccct    | 24           | 64.9  | 249                            |
| Contig12298              | (gt)3agtg(gaa)4gta(gaa)11 | 11           | 18             | ataaagatgatgcctgggtaggg     | 24           | 65.3  | gactgcaacatacacacaaagctaa | 25           | 60.6  | 246                            |
| Contig12319              | (ag)13                    | 13           | 13             | cagcaaatgtgacaacacagatcg    | 24           | 65.0  | ttattggtcggagtgggtatggac  | 24           | 65.1  | 290                            |
| Contig12423              | * (tc)7tt(tc)22           | 22           | 29             | tggcactggtttctcttttcttc     | 24           | 65.0  | tccacagaaggcagagattttcc   | 24           | 64.9  | 133                            |
| Contig12554              | (tc)3ctctctcc(tc)10       | 10           | 13             | tgattgggtgaaactgaagatgga    | 24           | 64.9  | cttctctctatcccacaacgcac   | 24           | 65.4  | 129                            |
| Contig12610              | (ag)11                    | 11           | 11             | aaagccctctcagtaccttttgc     | 24           | 65.0  | cttcttgattcgtggtatggctc   | 24           | 65.1  | 244                            |
| Contig12696              | (tc)11                    | 11           | 11             | ggcaaacctctccctctcatcaagt   | 24           | 65.0  | cccactccatccgattaacattct  | 24           | 64.4  | 248                            |
| Contig12991              | (ta)10                    | 10           | 10             | aatgtaacctcaagccagccttt     | 24           | 65.0  | tggagaaaccagagaatggggtta  | 24           | 65.0  | 221                            |
| Contig13120              | (ta)10                    | 10           | 10             | cattattgcccttggtatggaaa     | 24           | 64.8  | tggatcggaaagcattctcttgt   | 24           | 65.2  | 281                            |
| Contig13139              | (ta)11(tg)9               | 11           | 20             | aataggatgtcaaagacagactactgc | 27           | 60.5  | ctcggtaaaatgtcggtcacaaag  | 24           | 64.9  | 186                            |
| Contig13200              | (ca)3ac(ta)11             | 11           | 14             | ggtagcagtacaaccccagatct     | 24           | 63.8  | gatcagtgtaaatcgagaccatga  | 24           | 64.8  | 226                            |
| Contig13327              | (ag)10                    | 10           | 10             | ggaatgtcaactaccacaaagaaga   | 26           | 63.7  | accatcgtctggaagaacttgag   | 24           | 65.0  | 276                            |
| Contig13374              | * (ta)33                  | 33           | 33             | gccatggaggaagattgaagaaga    | 24           | 64.9  | acaagacatcaactgtggctggag  | 24           | 64.9  | 255                            |
| Contig13560              | * (tc)13                  | 13           | 13             | ccactgtgtgtgagaatccagctt    | 24           | 64.9  | ggaattgcgtttagacttgcatec  | 24           | 65.0  | 210                            |
| Contig13574              | (ta)15                    | 15           | 15             | taaagctcacgcagttaatccac     | 24           | 64.5  | ttcttgggtgcacatctcattt    | 24           | 65.0  | 269                            |
| Contig13588              | (ag)11                    | 11           | 11             | tgagaattgaagggtgtgtaggca    | 24           | 65.0  | atgtctgattctctcccccaacc   | 23           | 64.8  | 101                            |
| Contig13620              | * (ga)3aacaagttac(ag)12   | 12           | 15             | acgtttccagatcaacctgaggag    | 24           | 65.0  | gatgcagtagattttccagctgct  | 24           | 63.9  | 121                            |
| Contig13756              | (tc)10                    | 10           | 10             | agtagacggatgggtagtggtgga    | 24           | 65.1  | gaatacactaccttgagccgcag   | 24           | 65.2  | 166                            |
| Contig13806              | (ta)10                    | 10           | 10             | atatatgatgccttccatccacg     | 24           | 65.1  | attggcgtttgattgcagcttac   | 24           | 65.4  | 173                            |
| JMFF003B05               | * (ag)16                  | 16           | 16             | cacaagaaaaacaccacagtaagagag | 27           | 61.7  | tcttgtgaggttgtgaaggagca   | 24           | 65.4  | 273                            |
| JMFF007H04               | (gaa)10                   | 10           | 10             | gaggaggaggagaagccagaagag    | 24           | 65.3  | ttggtggcagaaggttctgatgta  | 24           | 65.0  | 293                            |
| JMFF007L19               | (gat)10                   | 10           | 10             | tatgggtgatgaaggaggaaggaa    | 24           | 65.0  | tcaacaaagtcgtctgcgtctctc  | 24           | 65.2  | 123                            |
| JMFF011H24               | (ag)10                    | 10           | 10             | agaaaaatcaacaacaccgcctta    | 24           | 64.9  | aagaatgtggagccaacagagacc  | 24           | 65.0  | 232                            |
| JMFF012J03               | (tc)11                    | 11           | 11             | ttggaaggcagaagagtttgac      | 24           | 64.9  | cttctctccactaagcctccctc   | 24           | 65.0  | 231                            |
| JMFF014I01               | (ag)10                    | 10           | 10             | ccagtgtgcgattcactcttctgt    | 24           | 65.0  | ttgtgttctcttgatcgcagttc   | 24           | 65.1  | 185                            |
| JMFF014O01               | (gaa)11(gat)3             | 11           | 14             | cagcagcggtagtcttactctga     | 24           | 65.1  | ctttctcctgtcgtctgcataa    | 24           | 64.6  | 108                            |

Supplemental Table 1. (continued)

| Unigene ID <sup>1)</sup> | Core motifs <sup>2)</sup>                 | Repeat (max) | Repeat (total) | fw <sup>3)</sup> primer    | Length (mer) | fw Tm | rv <sup>4)</sup> primer      | Length (mer) | rv Tm | Product size(bp) <sup>7)</sup> |
|--------------------------|-------------------------------------------|--------------|----------------|----------------------------|--------------|-------|------------------------------|--------------|-------|--------------------------------|
| JMFF023M20               | (tc)11(ta)8                               | 11           | 19             | attcacgttgcccattctcacttt   | 24           | 65.1  | aaacctgctttcaggtttatgga      | 24           | 64.9  | 255                            |
| JMFF025H23               | (ag)7ac(ag)11                             | 11           | 18             | cacatgaactccctgtgccataat   | 24           | 64.3  | tgcagaagaacctttgttgacca      | 24           | 65.1  | 212                            |
| JMFF030N04 *             | (ag)17                                    | 17           | 17             | tgcaaacctgaaactctcacaca    | 24           | 64.2  | cagcttttcccacatctctgcaac     | 24           | 66.4  | 215                            |
| JMFF035A09               | (ag)10ac(ag)9                             | 10           | 19             | tctactctgaagtaaaacaaggagc  | 26           | 60.6  | tgcagagcaccgcgacaaatagtaa    | 24           | 65.0  | 156                            |
| JMFF039J15 *             | (ctc)3tgc(ag)15                           | 15           | 18             | gggtgctctttgatttgcatttc    | 24           | 65.3  | ggatgagaaactgctagggggaag     | 24           | 65.4  | 209                            |
| JMFF043B04               | (ta)11t(ag)8                              | 11           | 19             | agaaaaacaaccagcgaactcaagc  | 24           | 65.1  | agcagccccagaactaacctaac      | 24           | 64.9  | 228                            |
| JMFF043D23 *             | (tc)14                                    | 14           | 14             | tcttctctatgctccctcctect    | 24           | 65.0  | aatgcaggtggaggatgaaatgtt     | 24           | 65.0  | 215                            |
| JMFF050I11               | (ag)11                                    | 11           | 11             | cattcacaccatccatactcca     | 24           | 65.0  | aatgtctctctgttcccagttc       | 24           | 65.0  | 284                            |
| JMFN003E19               | (ta)10                                    | 10           | 10             | taagctagccatattcctctggca   | 24           | 65.2  | tgcttggcacagtattcactcaca     | 24           | 65.1  | 256                            |
| JMFN006E15               | (ta)10                                    | 10           | 10             | ctctctcttaaccaacagccctc    | 24           | 64.9  | gaaaacgttgcgtattcaaggacc     | 24           | 64.9  | 194                            |
| JMFN007K12 *             | (ta)30                                    | 30           | 30             | ctcttgggctgttcagtcgatag    | 24           | 65.5  | ggggaggcatatacaactagtagtaaca | 27           | 62.0  | 291                            |
| JMFN008E02 *             | (ag)4aaggcg(ag)3gaaga<br>(ag)13           | 13           | 20             | gggggaatcgtgacagagtta      | 22           | 62.4  | ggaaagcttacaccagaacggaa      | 24           | 64.7  | 173                            |
| JMFN016N09 *             | (ct)3gctg(cgc)3cg(ta)25ca<br>catacat(ac)3 | 25           | 34             | ttaaccttccactccctccaaat    | 24           | 65.0  | gtcggactcagctctagcctcact     | 24           | 64.7  | 192                            |
| JMFN020H15 *             | (tat)12                                   | 12           | 12             | tagtccgtgtgactgggtgctcaa   | 24           | 65.0  | aagcctctgctctgtctttctt       | 24           | 65.0  | 243                            |
| JMFN028C18               | (ta)11                                    | 11           | 11             | taacacgaagacgaaggagaaggc   | 24           | 65.0  | acaataatgaacctgttttccc       | 24           | 65.0  | 289                            |
| JMFN029H19 *             | (ta)22                                    | 22           | 22             | tatcttcttccacctcccgaatc    | 24           | 65.6  | ataaaagggtgacgaacagcgacga    | 24           | 66.1  | 271                            |
| JMFN032F23 *             | (ta)16                                    | 16           | 16             | tetgaaaccaatcatcttctcccc   | 24           | 64.7  | tgagtaatcactgggaaacgacca     | 24           | 64.9  | 263                            |
| JMFN033H19 *             | (ta)33                                    | 33           | 33             | aaacgctcgtcaaaagcaagaaag   | 24           | 65.0  | taaaggagcgcgcttgacaagat      | 24           | 65.3  | 207                            |
| JMFN035D03 *             | (tg)7(ag)14tt(ag)5                        | 14           | 26             | tctccactactttctgagactgagc  | 25           | 60.6  | ttttccacggttgagaaagatgat     | 24           | 65.0  | 241                            |
| JMFN041N11               | (ta)11                                    | 11           | 11             | cgagatcctccaggctactccaa    | 24           | 65.1  | tgaactccaataatgttccaactgc    | 25           | 63.4  | 260                            |
| JMFS006E03 *             | (tc)14                                    | 14           | 14             | ctctctctagtgaagaccaccggc   | 24           | 64.9  | caccgatctgccctatactatc       | 24           | 65.0  | 279                            |
| JMFS018E02 *             | (ta)15                                    | 15           | 15             | tgtgatgtcaaaatgtcaggatgc   | 24           | 64.3  | cttttaatgattgtgccggctgat     | 24           | 65.3  | 143                            |
| JMFS019B06               | (ag)10                                    | 10           | 10             | gattcctagcactgcgtacatga    | 24           | 64.6  | ccagtccgtaactagaaggcaagc     | 24           | 64.5  | 292                            |
| JMFS028A02 *             | (ta)18                                    | 18           | 18             | aaaagcaaatgaaaccacgtaccg   | 24           | 65.2  | tcgaagttgcttcttcaaaggtc      | 24           | 65.0  | 115                            |
| JMFS030B05               | (ta)10                                    | 10           | 10             | acctgaaacagaatgcgttgaca    | 24           | 65.1  | tcgtgaaagcaagaatctgatcca     | 24           | 65.3  | 262                            |
| JMFS030F04 *             | (tg)9(ta)26                               | 26           | 35             | tgaaggggctaggggatatcatt    | 24           | 64.9  | acatcccaatgccaagtatcgagt     | 24           | 65.0  | 281                            |
| JMFS033D01 *             | (ta)24tg(ta)5                             | 24           | 29             | caaagcattaattacgtactgtttca | 26           | 58.8  | catccatacatgcttgggagt        | 21           | 59.8  | 199                            |
| JMFS033D01 *             | (ta)18                                    | 18           | 18             | gattgtgtgcaccacttgt        | 20           | 59.5  | cacgcaccttaagcacaaaa         | 20           | 59.9  | 210                            |
| JMFS038H06 *             | (ta)12                                    | 12           | 12             | gctagcttcgcttcataaggtta    | 24           | 65.0  | gaaaccttcgattcttcccactt      | 24           | 64.8  | 194                            |
| JMFS047H07               | (tg)10                                    | 10           | 10             | gagagttgatcagttggggagaaa   | 24           | 65.0  | ttctcgtgggcattagtgagaaca     | 24           | 65.2  | 231                            |
| JMFS049C04 *             | (ac)14aagtc(ta)4                          | 14           | 18             | atatcacctgaagcctcaacggaa   | 24           | 65.1  | tgcagaatcattcgaccatttcag     | 24           | 65.5  | 254                            |
| JMFS051D07 *             | (ta)14                                    | 14           | 14             | cggccgacctttaatctcctact    | 24           | 65.0  | gtacctcttggccgctcatgaaac     | 24           | 65.1  | 176                            |
| JMFS052D04               | (taa)11                                   | 11           | 11             | ttccggtacaaaatacgggaagtcg  | 24           | 65.2  | tttaacttggcctcatcgtcacct     | 24           | 65.1  | 265                            |
| JMFS056F10               | (tc)10                                    | 10           | 10             | ccaccaaacacacacaaattcaca   | 24           | 64.9  | gactgaaacttggggaaaaaggg      | 24           | 65.1  | 299                            |
| JMFS077C11               | (tc)10(ta)7ca(ta)3                        | 10           | 20             | accaaaagctcctctctgtttctc   | 24           | 65.2  | atcacccatgaaggcctagtcag      | 24           | 64.7  | 247                            |
| JMFS079F08 *             | (ta)17                                    | 17           | 17             | cggccggccataactactatttt    | 24           | 65.1  | tgctgagtgaaacctttagtaca      | 24           | 65.3  | 267                            |



Supplemental Table 1. (continued)

| Unigene ID <sup>1)</sup> | Core motifs <sup>2)</sup>                      | Repeat (max) | Repeat (total) | fw <sup>3)</sup> primer    | Length (mer) | fw Tm | rv <sup>4)</sup> primer  | Length (mer) | rv Tm | Product size(bp) <sup>7)</sup> |
|--------------------------|------------------------------------------------|--------------|----------------|----------------------------|--------------|-------|--------------------------|--------------|-------|--------------------------------|
| JMFS084E02               | (ag)3aagtctagccag(ga)3c<br>t(ag)10aagccac(tc)4 | 10           | 20             | ctcttctcaccgctctccctctct   | 24           | 65.7  | cagcgaattagaagcagcagatca | 24           | 65.0  | 213                            |
| JMFS099H12               | (tc)11tgtgtaca(ta)4                            | 11           | 15             | gctctgcctttactcegttttct    | 24           | 65.2  | ctctggtagtgcaccatcctcctt | 24           | 65.0  | 124                            |
| JMFS102F01               | (ta)4catatatatg(ta)11                          | 11           | 15             | cttggatctcagatcttcagaggga  | 24           | 65.2  | atggaattaatctcagacgccga  | 24           | 65.0  | 287                            |
| JMFS130G01               | (tc)10                                         | 10           | 10             | ccctactgaaaatcaagctccgt    | 24           | 65.7  | catagcaatcccaactcttctcgg | 24           | 65.2  | 188                            |
| JMFS140D08               | * (ta)38                                       | 38           | 38             | aagaagaactactccgtattattgaa | 26           | 56.3  | caacggagtcaatttttcc      | 20           | 60.5  | 160                            |
| JMFS147F08               | * (ta)24                                       | 24           | 24             | tggtgaacaaatcgatacacga     | 22           | 61.3  | tttcgtgaaattaagtcccgagt  | 24           | 64.1  | 251                            |
| JMFS155F04               | * (ac)14a(ta)14                                | 14           | 28             | tcatatggaaactggtgtctccca   | 24           | 64.8  | attgttttcgggacagacaaggaa | 24           | 65.0  | 233                            |
| JMFS160E10               | (ta)11                                         | 11           | 11             | tgtttgtttgttctctgtagcca    | 24           | 65.6  | gccaaaagcaagtgtttggatttc | 24           | 65.0  | 271                            |
| JMFS169B07               | (tc)10                                         | 10           | 10             | ccaccaaacacacacaaattcaca   | 24           | 64.9  | gactgaaacttggggaaaaagg   | 24           | 65.1  | 299                            |
| JMSF001H23               | * (tc)12                                       | 12           | 12             | tctctcttcaagcagacaagaaaac  | 27           | 62.8  | catcgaaatttctcagagcagg   | 23           | 65.4  | 101                            |
| JMSF002G14               | * (tct)14                                      | 14           | 14             | gtttatggttaaaatggcgagca    | 24           | 65.0  | ggcttggagaaggatcaacttca  | 24           | 64.9  | 265                            |
| JMSF004D24               | (ag)10                                         | 10           | 10             | tttggacacttctggcgagatttt   | 24           | 65.1  | aagatcgatgccaaagtaagcagt | 24           | 65.5  | 219                            |
| JMSF005H09               | * (tct)13                                      | 13           | 13             | tttgtgtcagagaagatttgggtca  | 24           | 65.0  | ctctgttcaaaacctccagcttc  | 24           | 64.6  | 254                            |
| JMSF007E13               | * (gaa)17                                      | 17           | 17             | atcatgcgactttcaatgttgagg   | 24           | 64.5  | gaatattagattccatggcgggtg | 24           | 64.6  | 153                            |
| JMSF007I11               | (ag)4aagctccagctg(ag)10                        | 10           | 14             | ggtgagagaaaagagagagggaaaa  | 25           | 62.6  | ttctctgttcttgaaggtggagg  | 24           | 65.1  | 231                            |
| JMSF011J06               | (tc)5t(tc)10                                   | 10           | 15             | gtaaaaggaaaagctgtcttccgc   | 24           | 63.6  | tgcagggaaaagaaaagaaacct  | 24           | 65.3  | 169                            |
| JMSF011O24               | (tc)10                                         | 10           | 10             | gtccgtccctcctaagattctctgt  | 24           | 65.0  | atccgatcaaaatcacaccttgt  | 24           | 64.9  | 182                            |
| JMSF011P24               | (tc)11                                         | 11           | 11             | ggtaactttccggcatttcaag     | 23           | 64.9  | cgcttcagagcggttgaggtact  | 24           | 65.2  | 194                            |
| JMSF012J19               | (ta)3c(tc)11                                   | 11           | 14             | aaaacaatccatttctcgggttc    | 24           | 65.3  | cgcaaggacttgcctgaagagtt  | 24           | 65.1  | 140                            |
| JMSF013E02               | (tc)11                                         | 11           | 11             | ggactttaaaccctcttctccct    | 24           | 63.2  | gtctttgattgttcaacgtggtgg | 24           | 64.8  | 181                            |
| JMSF015H22               | * (ag)17                                       | 17           | 17             | agtcttcaagaatcaacgcggag    | 24           | 65.0  | aactgtttaccgacatcgctctct | 24           | 62.6  | 137                            |
| JMSF018H02               | * (ag)12                                       | 12           | 12             | gaggcagctgcttgggttgtatt    | 24           | 65.0  | gcttcccttctctctccatctcc  | 24           | 65.0  | 211                            |
| JMSF022B15               | * (gaa)12                                      | 12           | 12             | atgaccttctctgctcaggaatcg   | 24           | 65.2  | aacaatgagtttcggctgtccaat | 24           | 65.1  | 212                            |
| JMSF024B19               | (tc)11                                         | 11           | 11             | caaaccactttctctctctct      | 24           | 65.0  | attcagggttcggctatctgtcaa | 24           | 65.1  | 142                            |
| JMSF024F16               | * (ag)12                                       | 12           | 12             | ccacctctctaccaatccctctt    | 24           | 65.0  | atctcctcgttgcctccatcaat  | 24           | 64.3  | 149                            |
| JMSF025B15               | (tc)10                                         | 10           | 10             | atactctccccctcagccttgtc    | 24           | 65.1  | ataacagaagcagatctgggtcc  | 24           | 63.9  | 201                            |
| JMSF025G18               | (tc)10                                         | 10           | 10             | cttaactgattcccattcccttcc   | 24           | 65.0  | gateaccagcttccacctaac    | 23           | 65.2  | 266                            |
| JMSF026B01               | * (tc)13                                       | 13           | 13             | caggagcataggactataggaggc   | 24           | 61.7  | tatgggtgggaaatcagaggagaa | 24           | 65.0  | 219                            |
| JMSF029A07               | * (tc)15cg(tg)3                                | 15           | 18             | acatcctcgtgctctctetaacacc  | 24           | 65.0  | cttgtacttgtgcaaccatccagc | 24           | 65.1  | 293                            |
| JMSF033C08               | * (tc)20                                       | 20           | 20             | agatgcagaaatgtggacaacgaa   | 24           | 65.1  | tatgagaatcatcatcaggtcccg | 24           | 64.4  | 294                            |
| JMSF033G03               | * (ag)16                                       | 16           | 16             | aatacaaaaacccaaccagcttt    | 24           | 64.8  | cggatagagagaggaggaaggagg | 24           | 64.9  | 300                            |
| JMSF034E11               | (tc)10                                         | 10           | 10             | gatggcggataactttcaagcct    | 24           | 65.6  | agcattgaacattctgggtggatt | 24           | 65.0  | 283                            |
| JMSF036F05               | (tc)10                                         | 10           | 10             | aactggggttgttcccttctctaa   | 24           | 65.0  | catgacctttagtgtctgggatg  | 24           | 65.1  | 244                            |
| JMSF037E17               | (tc)10                                         | 10           | 10             | gatctccaaaccctctccct       | 22           | 66.0  | ataacagaagcagatctgggtcc  | 24           | 63.9  | 174                            |
| JMSF043D02               | (ac)10                                         | 10           | 10             | tggatgctaaatccctcaaccatc   | 24           | 65.3  | gcctattgaagccaacggatacac | 24           | 64.9  | 272                            |
| JMSF046J01               | * (tc)16                                       | 16           | 16             | acggagcatatctataactgaagc   | 25           | 60.1  | tccggttaaactcagggaagaaa  | 24           | 64.1  | 172                            |
| JMSF049E09               | (ag)10                                         | 10           | 10             | gtatctacatgcgtcccttccagg   | 24           | 65.0  | atatccatacaggcgtgcacaaa  | 24           | 65.6  | 176                            |

Supplemental Table 1. (continued)

| Unigene ID <sup>1)</sup> | Core motifs <sup>2)</sup>                                     | Repeat (max) | Repeat (total) | fw <sup>3)</sup> primer   | Length (mer) | fw Tm | rv <sup>4)</sup> primer   | Length (mer) | rv Tm | Product size(bp) <sup>7)</sup> |
|--------------------------|---------------------------------------------------------------|--------------|----------------|---------------------------|--------------|-------|---------------------------|--------------|-------|--------------------------------|
| JMSF050D24               | (ag)10                                                        | 10           | 10             | ggaccagtggcagctatgtgagta  | 24           | 65.4  | cttcagaattcgccatcttctgtct | 24           | 64.8  | 134                            |
| JMSF052L14               | (tc)11                                                        | 11           | 11             | atacccactctgggctgtcttt    | 24           | 65.3  | ccaaaagcaaccatcttttacgc   | 24           | 64.8  | 209                            |
| JMSF052N08               | (ag)3ctgtgatt(ag)9gtat<br>(ag)4ga(ag)3gaag(ag)3               | 9            | 22             | caatccatagaagctctgcttgc   | 24           | 65.4  | gtcaatagaaacggaatcgctgct  | 24           | 64.8  | 255                            |
| JMFF015E19               | (ac)4c(tc)9tt(tc)3aacatcc<br>attca(ta)4aacatccattcat<br>(at)3 | 9            | 23             | ccgcacagtgatgtttctcatct   | 24           | 64.8  | ctgggtaaatctcgctctgacacc  | 24           | 65.4  | 284                            |
| JMFF038C14               | (tc)10tagtctc(ta)7                                            | 10           | 17             | ttgacaatgcaacctttccaag    | 24           | 65.3  | ggagatacctcacccttgcctctt  | 24           | 65.1  | 218                            |
| JMFF041I11               | * (ta)12                                                      | 12           | 12             | attctcttccgcttttgcttagg   | 24           | 65.0  | ctcttcttccagcgtaaccctt    | 24           | 65.0  | 171                            |
| JMFF042K01               | (ag)10                                                        | 10           | 10             | gcaataaattgggtccagcaaaaga | 24           | 65.3  | ccctataggtgaaatgtgccttgc  | 24           | 64.9  | 186                            |
| JMFF043B04               | * (tc)8(ta)12                                                 | 12           | 20             | agcagccccagaactaacctaac   | 24           | 64.9  | agaaaaacaaccagcgaactcaagc | 24           | 65.1  | 228                            |
| JMFF047C24               | * (ta)15                                                      | 15           | 15             | tctaccctcatgcatccactat    | 24           | 64.9  | gatttagcccttgcatcagatca   | 24           | 63.6  | 165                            |
| JMFF048M13               | (tc)10                                                        | 10           | 10             | ataagtaacgggaaaagctggcct  | 24           | 64.3  | cattgaactcattctgcaagacg   | 24           | 65.2  | 262                            |
| JMFF051M10               | * (ta)22                                                      | 22           | 22             | tacaaagggttcagaaatgcacca  | 24           | 64.8  | aatctcttctgtgctcgacttcat  | 24           | 64.7  | 216                            |
| JMSF003D07               | (taa)12                                                       | 12           | 12             | gcaaccacatgccataaaaatgta  | 24           | 64.8  | gagtcgttggaggatgcaactttt  | 24           | 64.9  | 195                            |
| JMSF008P12               | * (tct)18                                                     | 18           | 18             | aaaccttccactcatttgatggc   | 24           | 66.4  | acccaaaagagaactcaggggtcc  | 24           | 65.0  | 262                            |
| JMSF013M07               | (ag)10                                                        | 10           | 10             | gaagcattgcatcgattcatcac   | 24           | 64.9  | tctttgagcagagcagactccaga  | 24           | 65.1  | 232                            |
| JMSF028C15               | (tc)11                                                        | 11           | 11             | acgeaacataaccctcagcaattt  | 24           | 64.9  | gtgcttaattgccctgtaacca    | 24           | 65.3  | 270                            |
| JMSF028N19               | (ta)12                                                        | 12           | 12             | tgtctacattcatcacaatctge   | 25           | 60.3  | gaaatactggcagaaggcgtgact  | 24           | 65.0  | 155                            |
| JMSF034E21               | * (ag)16                                                      | 16           | 16             | caaatcaggttcataacagcagga  | 24           | 62.5  | caagcgttccatcactgaaaat    | 24           | 65.4  | 229                            |
| JMSF036G19               | * (ag)14                                                      | 14           | 14             | cttcggagcatttggagaacagc   | 24           | 64.9  | ctgcaatggagtggaaactcaaga  | 24           | 64.8  | 205                            |
| JMSF044O11               | * (ag)21                                                      | 21           | 21             | ggtctgcagttctcacttcaatgc  | 24           | 64.6  | ttgtgtgataaaggcagcagcagt  | 24           | 65.3  | 297                            |
| JMSF050P17               | (tg)10                                                        | 10           | 10             | gacagtgaagcaggacaggttcc   | 25           | 64.8  | gtaacaggaagtcggctgtgttga  | 24           | 64.8  | 224                            |
| JMSF051O02               | (tct)10                                                       | 10           | 10             | agaaatcaccacccaaaacacagc  | 24           | 65.5  | agtctgagtggttctcatccacgg  | 24           | 64.8  | 144                            |
| JMSF053A15               | (ta)10ttagcnggagatg(ta)<br>4                                  | 10           | 14             | ataaccggcagacacaccagaagt  | 24           | 65.2  | atgttcaaggccctcaagaatctg  | 24           | 64.8  | 241                            |

<sup>1)</sup> Unigene ID is based on the Japanese morning glory cDNA Database (<http://ipomoeanil.nibb.ac.jp/>).

<sup>2)</sup> Core motif of SSR. Alphabets in the parentheses show motif DNA sequence. Numbers after parentheses show repeat number of motifs. DNA sequences between parentheses are interval sequences between motifs.

<sup>3)</sup> Repeat max shows the largest number of repeat in the core motif.

<sup>4)</sup> Repeat total shows the sum of repeat number in the motif.

<sup>5)</sup> fw is forward.

<sup>6)</sup> rv is reverse.

<sup>7)</sup> PCR product size using I. nil var 'Tokyo Kokei Standard' as a template.

<sup>8)</sup> Asterisk show unigenes of which primers were synthesized and examined polymorphism among morning glories.

Supplemental Table 2. Japanese morning glory EST-SSRs of which primers were not automatically designed

| Unigene ID <sup>1)</sup> | Core motifs <sup>2)</sup>                                         | Repeat (max) <sup>3)</sup> | Repeat (total) <sup>4)</sup> | Unigene ID | Core motifs                                                           | Repeat (max) | Repeat (total) |
|--------------------------|-------------------------------------------------------------------|----------------------------|------------------------------|------------|-----------------------------------------------------------------------|--------------|----------------|
| JMFF001I14               | (taa)10                                                           | 10                         | 10                           | JMFF044P02 | (ac)9a(ta)19                                                          | 19           | 28             |
| JMFF004A14               | (gt)3aagcatttct(ag)13                                             | 13                         | 16                           | JMFF045G10 | (tc)10cctcgctt(tc)4                                                   | 10           | 14             |
| JMFF004F14               | (tc)16                                                            | 16                         | 16                           | JMFF046D22 | (tc)12                                                                | 12           | 12             |
| JMFF005L02               | (ta)23                                                            | 23                         | 23                           | JMFF046E05 | (tc)11                                                                | 11           | 11             |
| JMFF006B16               | (tc)11c(tc)5                                                      | 11                         | 16                           | JMFF046I15 | (ag)11                                                                | 11           | 11             |
| JMFF006C02               | (ta)11                                                            | 11                         | 11                           |            | (caa)3gcgttacaagatc                                                   | 8            | 25             |
| JMFF006D23               | (ac)3tcc(tc)5cc(tc)12tga<br>tcctaagc(ca)3                         | 12                         | 23                           | JMFF046I19 | (gat)3gcg(ta)7gcg(ta)4t<br>gtt(ta)8                                   |              |                |
| JMFF006E08               | (ag)16                                                            | 16                         | 16                           | JMFF050D23 | (tc)12                                                                | 12           | 12             |
| JMFF006G15               | (ag)3tg(ag)11                                                     | 11                         | 14                           | JMFN002G05 | (gca)3(ta)17ca(ta)8                                                   | 17           | 28             |
| JMFF006M10               | (tc)10                                                            | 10                         | 10                           | JMFN004B10 | (taa)16acttcca(ta)4                                                   | 16           | 20             |
| JMFF006N18               | (tc)16                                                            | 16                         | 16                           | JMFN007B08 | (ta)11                                                                | 11           | 11             |
| JMFF007C16               | (ag)14                                                            | 14                         | 14                           |            | (ta)10cattaaataac(at)3                                                | 10           | 20             |
| JMFF007K18               | (ag)10                                                            | 10                         | 10                           | JMFN007I24 | gcatgtct(ta)3gcatg(ta)4                                               |              |                |
| JMFF008H24               | (ag)10                                                            | 10                         | 10                           |            |                                                                       |              |                |
| JMFF009K23               | (ag)17gg(ag)3aatactcna<br>t(ta)3                                  | 17                         | 23                           | JMFN007O13 | (gaa)10                                                               | 10           | 10             |
| JMFF010C01               | (ctt)3caatccc(tc)20                                               | 20                         | 23                           | JMFN008E18 | (tc)11ttca(tc)4                                                       | 11           | 15             |
| JMFF010G22               | (ag)13                                                            | 13                         | 13                           | JMFN012M21 | (ag)6a(ag)12gg(ga)3                                                   | 12           | 21             |
| JMFF010O04               | (ga)3ttgaaaagc(ag)10                                              | 10                         | 13                           | JMFN013H23 | (ac)10                                                                | 10           | 10             |
| JMFF012H22               | (tc)14cgacc(tc)3                                                  | 14                         | 17                           | JMFN014G16 | (ta)15ga(ta)17                                                        | 17           | 32             |
| JMFF013B12               | (tc)10                                                            | 10                         | 10                           |            | (tc)5gcttta(tc)10tata                                                 | 10           | 28             |
| JMFF013P16               | (ga)3ctgagaaac(ag)15                                              | 15                         | 18                           | JMFN015L03 | g(ac)3aaa(ta)3aaata<br>(ta)3aaatatata(tc)4                            |              |                |
| JMFF014D05               | (tc)13ttctctct(tc)4                                               | 13                         | 17                           | JMFN032K07 | (taa)10                                                               | 10           | 10             |
| JMFF014O06               | (tc)3c(tc)11                                                      | 11                         | 14                           | JMFN033G17 | (ta)15                                                                | 15           | 15             |
| JMFF015H22               | (tc)19                                                            | 19                         | 19                           |            | (ta)5a(ta)5atata(tat)3a<br>atgttg(taa)8(ta)3                          | 8            | 24             |
| JMFF015M18               | (ta)6t(ac)6gttgtgt(tg)3<br>(ta)3gtt(ta)3g(ac)3gtt<br>(ta)3gt(ta)4 | 6                          | 31                           | JMFN033N17 |                                                                       |              |                |
|                          |                                                                   |                            |                              | JMFN034O22 | (ta)20                                                                | 20           | 20             |
| JMFF017C16               | (tc)24                                                            | 24                         | 24                           | JMFN035N10 | (ag)3aa(ag)11                                                         | 11           | 14             |
| JMFF017J24               | (tc)13                                                            | 13                         | 13                           | JMFN039L21 | (ta)29t(ac)3t(tc)4                                                    | 29           | 36             |
| JMFF017P18               | (ta)10                                                            | 10                         | 10                           | JMFN043B04 | (ta)22                                                                | 22           | 22             |
|                          | (ac)5aa(ac)3aaaaaa                                                | 5                          | 25                           | JMFN046N16 | (tc)10                                                                | 10           | 10             |
| JMFF018E20               | (ac)4aaaaaa(at)3aa(at)<br>3(ta)4a(ag)3                            |                            |                              | JMFS003H02 | (tc)10                                                                | 10           | 10             |
|                          |                                                                   |                            |                              | JMFS011C04 | (ta)10                                                                | 10           | 10             |
| JMFF018K23               | (ag)28ng(ag)5                                                     | 28                         | 33                           |            | (tat)11at(tat)7t(tta)3ttt<br>att(taa)7                                | 11           | 28             |
| JMFF018L19               | (tc)11                                                            | 11                         | 11                           | JMFS015H04 |                                                                       |              |                |
| JMFF019C15               | (tc)12                                                            | 12                         | 12                           |            | (ac)4gaag(ta)3gaagtata<br>taaaa(ta)5gaagtata<br>(ta)7tacacaccaa(ta)17 | 17           | 36             |
| JMFF020E12               | (ctt)3caatccc(tc)16nc<br>(tc)3                                    | 16                         | 22                           | JMFS017H03 |                                                                       |              |                |
| JMFF023D24               | (ag)23                                                            | 23                         | 23                           | JMFS024H10 | (ac)5agac(ag)5ggacag<br>(ac)15(ag)8                                   | 15           | 33             |
| JMFF023O23               | (tc)5ccccc(tc)10                                                  | 10                         | 15                           | JMFS028B01 | (ta)18                                                                | 18           | 18             |
| JMFF028P02               | (ag)4aa(ag)15aaaaagc<br>(gt)3                                     | 15                         | 22                           | JMFS033C08 | (gaa)3at(tat)25                                                       | 25           | 28             |
| JMFF029E14               | (ag)4aagttc(ag)18                                                 | 18                         | 22                           | JMFS034D10 | (ag)10(gt)3                                                           | 10           | 13             |
| JMFF030O17               | (tc)10                                                            | 10                         | 10                           | JMFS037C09 | (tc)13                                                                | 13           | 13             |
| JMFF030O19               | (tc)10                                                            | 10                         | 10                           | JMFS040E04 | (ta)19                                                                | 19           | 19             |
| JMFF031H10               | (tc)7ctctctctccc(tc)19tn<br>nnnnnnnt(tc)6                         | 19                         | 32                           | JMFS042G08 | (tc)10                                                                | 10           | 10             |
|                          |                                                                   |                            |                              |            | (ta)24aacattttaactt(ta)<br>3                                          | 24           | 27             |
| JMFF031H10               | (ag)5aa(ag)25gg(ag)3n<br>ng(ag)7                                  | 25                         | 40                           | JMFS044A12 |                                                                       |              |                |
|                          |                                                                   |                            |                              | JMFS067F07 | (ta)17tgtatcttag(cca)3                                                | 17           | 20             |
| JMFF031K12               | (ag)12tggttagagg(ga)3                                             | 12                         | 15                           | JMFS070A09 | (ag)4ggagat(ag)10                                                     | 10           | 14             |
|                          | (ag)22nggg(ag)3tttnata<br>ntggn(ct)3                              | 22                         | 28                           | JMFS070D02 | (ta)18                                                                | 18           | 18             |
| JMFF033G10               |                                                                   |                            |                              | JMFS073C03 | (ta)27                                                                | 27           | 27             |
| JMFF033I02               | (tc)10                                                            | 10                         | 10                           | JMFS075C06 | (tc)13                                                                | 13           | 13             |
| JMFF035J15               | (tc)14                                                            | 14                         | 14                           | JMFS081H11 | (tat)17                                                               | 17           | 17             |
|                          | (ag)3atagagggaga(ta)5<br>aat(ag)22                                | 22                         | 30                           | JMFS097H04 | (ag)11                                                                | 11           | 11             |
| JMFF038N12               |                                                                   |                            |                              | JMFS098A08 | (tc)17                                                                | 17           | 17             |
| JMFF038P22               | (ag)13g(ag)3                                                      | 13                         | 16                           | JMFS107E03 | (tc)12                                                                | 12           | 12             |
| JMFF039J24               | (tc)17                                                            | 17                         | 17                           |            | (tg)5cgtgtgta(ta)8gaa<br>(ag)8                                        | 8            | 21             |
| JMFF041J19               | (tc)12ttctcttatt(tc)3                                             | 12                         | 15                           | JMFS108A11 |                                                                       |              |                |
| JMFF043L09               | (tc)10                                                            | 10                         | 10                           | JMFS119H10 | (tc)10                                                                | 10           | 10             |
|                          |                                                                   |                            |                              | JMFS128D03 | (tat)26                                                               | 26           | 26             |

Supplemental Table 2. (continued)

| Unigene ID | Core motifs                      | Repeat (max) | Repeat (total) | Unigene ID | Core motifs              | Repeat (max) | Repeat (total) |
|------------|----------------------------------|--------------|----------------|------------|--------------------------|--------------|----------------|
| JMFS130C01 | (tc)3ccttt(tc)10                 | 10           | 13             | JMSF038L03 | (tc)17                   | 17           | 17             |
| JMFS135C09 | (tc)10tatctceta(tc)3             | 10           | 13             | JMSF038O01 | (tc)3ta(tc)4tacatc(ta)10 | 10           | 17             |
| JMFS147D10 | (ag)14                           | 14           | 14             | JMSF039A01 | (tc)10                   | 10           | 10             |
| JMFS149D03 | (tc)11accc(ca)3acacagctgagg(ag)3 | 11           | 17             | JMSF039A11 | (tc)17                   | 17           | 17             |
| JMFS156F04 | (ta)5ca(tc)12                    | 12           | 17             | JMSF039F23 | (ag)14                   | 14           | 14             |
| JMFS157F06 | (tat)18                          | 18           | 18             | JMSF039I10 | (ag)13                   | 13           | 13             |
| JMFS161F12 | (ag)10                           | 10           | 10             | JMSF039K04 | (ag)18ggagaa(ag)4        | 18           | 22             |
| JMFS164G02 | (tc)13                           | 13           | 13             | JMSF040H05 | (ag)5aa(ag)24ng(ag)3a    | 24           | 38             |
| JMSF001C08 | (ag)4gggg(ag)13at(ta)4           | 13           | 21             | JMSF041L10 | (ag)3atagggggagagg       | 12           | 15             |
| JMSF001G22 | (tc)14                           | 14           | 14             | JMSF042D11 | (ag)12                   | 14           | 14             |
| JMSF002G16 | (ag)12                           | 12           | 12             | JMSF042G08 | (tc)12                   | 12           | 12             |
| JMSF002J14 | (ag)17aanatggtgatgg              | 17           | 20             | JMSF042G23 | (ag)12                   | 12           | 12             |
| JMSF004D19 | (ag)3                            | 13           | 13             | JMSF042J06 | (ag)13                   | 13           | 13             |
| JMSF005D09 | (tc)13                           | 19           | 33             | JMSF042N06 | (tc)4c(tc)16             | 16           | 20             |
| JMSF005D23 | (ag)19ananac(ag)14               | 10           | 13             | JMSF042O23 | (ag)14g(ag)3             | 14           | 17             |
| JMSF005F05 | (tc)10cctacgca(tc)3              | 15           | 24             | JMSF043F18 | (ag)12                   | 12           | 12             |
| JMSF005F05 | (tc)15(ta)9                      | 10           | 10             | JMSF043H12 | (tc)17                   | 17           | 17             |
| JMSF005I19 | (tct)10                          | 22           | 22             | JMSF043J01 | (ag)10                   | 10           | 10             |
| JMSF008K04 | (ag)22                           | 15           | 18             | JMSF043L06 | (tc)14                   | 14           | 14             |
| JMSF009B24 | (tc)15tggt(ta)3                  | 11           | 11             | JMSF045C14 | (tg)10t(ga)3             | 10           | 13             |
| JMSF010J21 | (tc)11                           | 10           | 10             | JMSF045G03 | (tc)10                   | 10           | 10             |
| JMSF011N01 | (tct)11                          | 14           | 14             | JMSF047D03 | (ac)3t(ag)17             | 17           | 20             |
| JMSF012J06 | (ag)10                           | 19           | 19             | JMSF047N15 | (ta)10                   | 10           | 10             |
| JMSF014E16 | (tc)14                           | 11           | 11             | JMSF047O16 | (tc)16tgntgttt(ta)3      | 16           | 19             |
| JMSF016D10 | (tc)19                           | 11           | 11             | JMSF048F05 | (tc)12                   | 12           | 12             |
| JMSF017G11 | (ag)11                           | 7            | 24             | JMSF048I12 | (ac)3ccctcaac(tc)16      | 16           | 19             |
| JMSF020C17 | (tc)11                           | 11           | 11             | JMSF049C21 | (tc)13g(tc)3             | 13           | 16             |
| JMSF020D11 | (tc)3ttcat(tc)4tt(tc)7ccc        | 7            | 24             | JMSF049H09 | (ag)3(at)3agagagagat     | 11           | 17             |
| JMSF022O04 | (ct)3a(ta)3at(ta)4               | 10           | 10             | JMSF050C15 | (ag)11                   | 20           | 25             |
| JMSF022O04 | (gaa)10                          | 11           | 11             | JMSF050H09 | (tc)5ccccatctcc(tc)20    | 10           | 10             |
| JMSF022P15 | (ta)11                           | 13           | 25             | JMSF051B24 | (tc)10                   | 12           | 16             |
| JMSF023C09 | (tc)13(ta)12                     | 17           | 20             | JMSF051C03 | (tc)12tt(tc)4            | 10           | 10             |
| JMSF023J12 | (tc)3tg(tc)17                    | 19           | 19             | JMSF051C08 | (ag)10                   | 10           | 10             |
| JMSF024M02 | (tc)19                           | 11           | 11             | JMSF051M17 | (ta)10                   | 19           | 19             |
| JMSF024P18 | (ta)11                           | 15           | 25             | JMSF052C07 | (ag)19                   | 19           | 19             |
| JMSF025D11 | (tc)15(ta)10                     | 12           | 12             | JMSF052M04 | (ag)15                   | 15           | 15             |
| JMSF025N13 | (tc)12                           | 12           | 12             | JMSF052M14 | (ag)14atacacaatt(ac)4    | 14           | 18             |
| JMSF025N24 | (ta)12                           | 25           | 28             |            |                          |              |                |
| JMSF026O12 | (tc)25tnaagagannac               | 25           | 28             |            |                          |              |                |
| JMSF027I16 | (tg)3                            | 11           | 11             |            |                          |              |                |
| JMSF027I16 | (tc)11                           | 17           | 17             |            |                          |              |                |
| JMSF027M09 | (tc)17                           | 14           | 14             |            |                          |              |                |
| JMSF029A15 | (ag)14                           | 10           | 10             |            |                          |              |                |
| JMSF030D21 | (ta)10                           | 5            | 25             |            |                          |              |                |
| JMSF032C06 | (tc)4ttcatt(tc)5ta(tc)4          | 17           | 17             |            |                          |              |                |
| JMSF033L05 | (ta)5t(ta)3tatat(ac)4            | 25           | 25             |            |                          |              |                |
| JMSF033L05 | (ag)17                           | 15           | 15             |            |                          |              |                |
| JMSF035A16 | (ag)25                           | 17           | 26             |            |                          |              |                |
| JMSF035I21 | (tc)15                           | 19           | 19             |            |                          |              |                |
| JMSF035J23 | (ac)17tg(tc)5ttctn(tc)4          | 13           | 16             |            |                          |              |                |
| JMSF035P21 | (tc)19                           | 9            | 24             |            |                          |              |                |
| JMSF036N13 | (ag)13ac(ag)3                    | 10           | 10             |            |                          |              |                |
| JMSF037G06 | (ag)4g(ag)3atagagat              | 11           | 18             |            |                          |              |                |
| JMSF037G06 | (ag)9ggggg(ag)4cgcgaagc          | 15           | 15             |            |                          |              |                |
| JMSF037G06 | ga(ag)4                          | 10           | 22             |            |                          |              |                |
| JMSF037J03 | (ag)10                           | 11           | 14             |            |                          |              |                |
| JMSF037O07 | (tc)4tt(tc)11ttgctcgett          | 11           | 18             |            |                          |              |                |
| JMSF038C05 | (tc)3                            | 15           | 15             |            |                          |              |                |
| JMSF038C05 | (tc)15                           | 10           | 22             |            |                          |              |                |
| JMSF038I09 | (ag)9a(ag)10tcatt(ta)3           | 11           | 14             |            |                          |              |                |
| JMSF038K06 | (ag)11atgc(ag)3                  |              |                |            |                          |              |                |

<sup>1)</sup> Unigene ID is based on the Japanese morning glory cDNA Database (<http://ipomoeanil.nibb.ac.jp/>).

<sup>2)</sup> Core motif of SSR. Alphabets in the parentheses show motif DNA sequence. Numbers after parentheses show repeat number of motifs. DNA sequences between parentheses are interval sequences between motifs.

<sup>3)</sup> Repeat max shows the largest number of repeat in the core motif.

<sup>4)</sup> Repeat total shows the sum of repeat number in the motif.
